# Supplementary material
Source: PubMed Central journal article supplement (PMC5136601)
Supplement: rspb20162201supp1.pdf [file rspb20162201supp1.pdf]

| Species                            | Mass (g) | EM | Breeding Range (m) | Winter Range | Sample Size Summer | Sample Size Winter |
|------------------------------------|----------|----|--------------------|--------------|--------------------|--------------------|
| <i>Parus monticolus</i>            | 13       | 0  | 1500-2800          | 1200-2800    | 37                 | 39                 |
| <i>Parus cinereous</i>             | 13       | 0  | 200-1500           | 200-1500     | 10                 | 13                 |
| <i>Parus xanthogenys</i>           | 15       | 0  | 1000-2100          | 1000-2100    | 10                 | 0                  |
| <i>Phylloscopus xanthoschistos</i> | 7        | 0  | 1200-2600          | 1200-2100    | 22                 | 9                  |
| <i>Phylloscopus reguloides</i>     | 8        | 1  | 2100-3200          | NA           | 13                 | NA                 |
| <i>Myiophonus caeruleus</i>        | 200      | 1  | 1500-3200          | 700-2000     | 10                 | 17                 |
| <i>Garulax erythrocephalus</i>     | 70       | 1  | 2100-3200          | 1200-2100    | 14                 | 20                 |
| <i>Garrulax variegatus</i>         | 60       | 1  | 2100-3200          | 1500-2400    | 8                  | 18                 |
| <i>Garrulax albogularis</i>        | 100      | 1  | 1800-2600          | 1400-2100    | 6                  | 20                 |
| <i>Ficedula superciliosa</i>       | 13       | 1  | 2600-3200          | NA           | 7                  | NA                 |
| <i>Ficedula strophliata</i>        | 12       | 1  | 2800-3200          | NA           | 9                  | NA                 |
| <i>Aegithalos concinnus</i>        | 6        | 0  | 1400-2600          | 1400-2600    | 14                 | 0                  |
| <i>Turdus boulboul</i>             | 80       | 0  | 1400-2400          | 1000-2400    | 5                  | 0                  |
| <i>Tarsiger rufilatus</i>          | 13       | 1  | 3000-3200          | 1500-2100    | 4                  | 13                 |
| <i>Phoenicurus frontalis</i>       | 15       | 1  | 2600-3200          | 1500-2100    | 9                  | 3                  |
